# Supplementary material for: Exogenous melatonin improves salt tolerance mainly by regulating the antioxidant system in cyanobacterium Nostoc flagelliforme
Source: PeerJ. 2022 Nov 29;10:e14479. doi: 10.7717/peerj.14479 (PMC9744160; doi:10.7717/peerj.14479)
Supplement: Supplemental Information 1 [file peerj-10-14479-s001.xlsx]

## Sheet: Dry weight
	Before Dried	After Dried	Dry weight(g)
	3.1709	3.1981	0.0272		0.0272	0.0244	0.0124	0.0189
CK	3.2184	3.2446	0.0262		0.0262	0.0272	0.011	0.0177
	3.1619	3.1897	0.0278		0.0278	0.0288	0.0171	0.0199
	3.1738	3.1982	0.0244		0.0270667	0.0268	0.0135	0.0188333
MT	3.1179	3.1451	0.0272	SD	0.00080829	0.00222711	0.00319531	0.00110151
	3.2052	3.234	0.0288
	3.1311	3.1435	0.0124
Na	3.2035	3.2145	0.011
	3.1417	3.1588	0.0171					Mean	SD
	3.2169	3.2358	0.0189				Control	0.0270667	0.00080829
MT+Na	3.2198	3.2375	0.0177				NaCl	0.0135	0.00319531
	3.1886	3.2085	0.0199				MT	0.0268	0.00222711
							MT+NaCl	0.0188333	0.00110151

## Sheet: Relative electrolytic leakage
	C1	C2	Cw	Relative electrolytic leakage(%)
	48.6	64.6	25.3	59.2875		59.2875	47.1616	107.634	89.3025
CK	36.2	47.2	25.3	49.7717		49.7717	53.8206	100.459	86.6281
	45.6	59.9	25.3	58.6705		58.6705	30.7692	95.4177	83.2279
	36.1	48.2	25.3	47.1616		55.9099	43.9171	101.17	86.3862
MT	41.5	55.4	25.3	53.8206	SD	5.3248	11.8632	6.13889	3.04451
	28.5	35.7	25.3	30.7692
	265	248	25.3	107.634
Na	244	243	25.3	100.459				Mean	SD
	296	309	25.3	95.4177			Control	55.9099	5.3248
	234	259	25.3	89.3025			NaCl	101.17	6.13889
MT+Na	265	302	25.3	86.6281			MT	43.9171	11.8632
	328	389	25.3	83.2279			MT+NaCl	86.3862	3.04451

## Sheet: Chlorophyll a
	A648.6	A664.1	Chlorophyll a (μg/mL)
	0.155	0.427	4.90027			4.90027	1.89762	1.73797	1.03806
CK	0.146	0.395	4.51946			4.51946	1.82928	1.12351	1.16945
	0.154	0.413	4.71842			4.71842	1.78709	1.43809	1.00019
	0.09	0.177	1.89762			4.71272	1.838	1.43319	1.06923
MT	0.08	0.168	1.82928		SD	0.190469	0.0557782	0.307259	0.0888317
	0.101	0.173	1.78709
	0.077	0.16	1.73797				Mean	SD
Na	0.095	0.121	1.12351			Control	4.71272	0.190469
	0.073	0.136	1.43809			NaCl	1.43319	0.307259
	0.078	0.108	1.03806			MT	1.838	0.0557782
MT+Na	0.081	0.119	1.16945			MT+NaCl	1.06923	0.0888317
	0.075	0.104	1.00019

## Sheet: The PSⅡ activity 
	The PSⅡ activity (Fv/Fm)
	0.33
CK	0.369		0.33	0.046	0.026	0.095
	0.331		0.369	0.024	0.058	0.087
	0.046		0.331	0.026	0.029	0.108
MT	0.024		0.343333	0.032	0.0376667	0.0966667
	0.026	SD	0.0222336	0.0121655	0.017673	0.0105987
	0.026
Na	0.058
	0.029
	0.095			Mean	SD
MT+Na	0.087		CK	0.343333	0.0222336
	0.108		MT	0.032	0.0121655
			Na	0.0376667	0.017673
			MT+Na	0.0966667	0.0105987

## Sheet: Phycobiliprotein
	A562	A620	A652	PC（mg/mL）	APC (mg/mL)	PE (mg/mL)
	0.326	0.222	0.127	0.0404457	0.015879	0.0223539			0.0404457	0.0112829	0.0267656	0.00963303			0.0223539	0.00439913	0.0100605	0.0026664
CK	0.251	0.17	0.094	0.0310008	0.0115206	0.0173084			0.0310008	0.0107566	0.020861	0.00929401			0.0173084	0.00406976	0.00821603	0.00260558
	0.257	0.114	0.069	0.0207358	0.00889745	0.0207352			0.0207358	0.012371	0.0190149	0.0103821			0.0207352	0.00470252	0.0079668	0.00290897
	0.077	0.063	0.058	0.0112829	0.00882043	0.00439913			0.0307275	0.0114702	0.0222138	0.00976971			0.0201325	0.00439047	0.00874779	0.00272698
MT	0.072	0.06	0.054	0.0107566	0.00815717	0.00406976		SD	0.00985779	0.000823322	0.00404855	0.000556773			0.00257617	0.000316472	0.00114368	0.000160515
	0.083	0.069	0.062	0.012371	0.0093611	0.00470252
	0.174	0.148	0.107	0.0267656	0.0149737	0.0100605
Na	0.138	0.115	0.076	0.020861	0.0102318	0.00821603
	0.131	0.105	0.073	0.0190149	0.0100511	0.0079668
	0.056	0.054	0.054	0.00963303	0.00840236	0.0026664				Mean	SD						Mean	SD
MT+Na	0.054	0.052	0.05	0.00929401	0.00769823	0.00260558			Control	0.0307275	0.00985779					Control	0.0201325	0.00257617
	0.06	0.058	0.054	0.0103821	0.0082389	0.00290897			MT	0.0114702	0.000823322					MT	0.00439047	0.000316472
									NaCl	0.0222138	0.00404855					NaCl	0.00874779	0.00114368
									MT+NaCl	0.00976971	0.000556773					MT+NaCl	0.00272698	0.000160515

## Sheet: Na+ and K+
Na+	C/mg/L	*10	V/10ml	m/g	mg/g		K+	C/mg/L	*10	V/10ml	m/g	mg/g	Na+/K+	K+/Na+
	0.789	7.89	0.0789	0.01	7.89			0.8187	8.187	0.08187	0.01	8.187	0.963723	1.03764
CK	0.627	6.27	0.0627	0.01	6.27		CK	0.794	7.94	0.0794	0.01	7.94	0.789673	1.26635
	0.81	8.1	0.081	0.01	8.1			0.6375	6.375	0.06375	0.01	6.375	1.27059	0.787037
	1.222	12.22	0.1222	0.01	12.22			0.6429	6.429	0.06429	0.01	6.429	1.90076	0.526105
MT	0.988	9.88	0.0988	0.01	9.88		MT	0.5929	5.929	0.05929	0.01	5.929	1.66639	0.600101
	0.8379	8.379	0.08379	0.01	8.379			0.6321	6.321	0.06321	0.01	6.321	1.32558	0.754386					1.03764	0.0795455	0.526105	0.272705
	1.408	14.08	0.1408	0.01	14.08			0.112	1.12	0.0112	0.01	1.12	12.5714	0.0795455					1.26635	0.100995	0.600101	0.212525
Na	1.307	13.07	0.1307	0.01	13.07		Na	0.132	1.32	0.0132	0.01	1.32	9.90152	0.100995					0.787037	0.0817984	0.754386	0.242066
	1.379	13.79	0.1379	0.01	13.79			0.1128	1.128	0.01128	0.01	1.128	12.2252	0.0817984					1.03034	0.0874462	0.626864	0.242432
	0.817	8.17	0.0817	0.01	8.17			0.4456	2.228	0.02228	0.01	2.228	3.66697	0.272705					0.239739	0.0117873	0.11647	0.0300918
MT+Na	1.006	10.06	0.1006	0.01	10.06		MT+Na	0.4276	2.138	0.02138	0.01	2.138	4.70533	0.212525
	0.9611	9.611	0.09611	0.01	9.611			0.4653	2.3265	0.023265	0.01	2.3265	4.1311	0.242066
	7.89	12.22	14.08	11.17				8.187	6.429	1.12	2.228				0.963723	1.90076	12.5714	5.01346		1.03034	0.239739
	6.27	9.88	13.07	10.06				7.94	5.929	1.32	2.138				0.789673	1.66639	9.90152	4.70533		0.0874462	0.0117873
	8.1	8.379	13.79	9.611				6.375	6.321	1.128	2.3265				1.27059	1.32558	12.2252	4.1311		0.626864	0.11647
	7.42	10.1597	13.6467	10.2803				7.50067	6.22633	1.18933	2.23083				1.00799	1.63091	11.566	4.61663		0.218018	0.0218265
SD	1.00145	1.93571	0.520032	0.802515				0.982648	0.263099	0.113231	0.0942819				0.243495	0.289227	1.45188	0.447821
		Mean	SD						Mean	SD						Mean	SD
	Control	7.42	1.00145					Control	7.50067	0.982648					Control	1.00799	0.243495
	MT	10.1597	1.93571					MT	6.22633	0.263099					MT	1.63091	0.289227
	NaCl	13.6467	0.520032					NaCl	1.18933	0.113231					NaCl	11.566	1.45188
	MT+NaCl	10.2803	0.802515					MT+NaCl	2.23083	0.0942819					MT+NaCl	4.61663	0.447821

## Sheet: NfEST1 gene
NfEST1
CK0-1	1.38511		1.38511	0.430773	0.190782	0.333325	0.456916	MT0-1	0.680657		0.680657	1.20999	0.424842	0.195467	0.517632
CK0-2	1.11342		1.11342	0.337978	0.225313	0.284204	0.630689	MT0-2	1.30134		1.30134	1.43396	0.673617	0.337978	0.150205
CK0-3	0.650671		0.650671	0.229251	0.193446	0.416099	0.41466	MT0-3	1.12506		1.12506	2.45377	2.47942	0.882703	0.166086
CK3-1	0.430773	Mean	1.04973	0.332667	0.20318	0.344543	0.500755	MT3-1	1.20999	Mean	1.03569	1.69924	1.19262	0.472049	0.277974
CK3-2	0.337978	SD	0.371338	0.100866	0.0192134	0.0666593	0.114492	MT3-2	1.43396	SD	0.319848	0.662968	1.12131	0.362705	0.207702
CK3-3	0.229251							MT3-3	2.45377
CK6-1	0.190782							MT6-1	0.424842
CK6-2	0.225313							MT6-2	0.673617
CK6-3	0.193446							MT6-3	2.47942
CK12-1	0.333325							MT12-1	0.195467
CK12-2	0.284204							MT12-2	0.337978
CK12-3	0.416099							MT12-3	0.882703
CK24-1	0.456916							MT24-1	0.517632
CK24-2	0.630689							MT24-2	0.150205
CK24-3	0.41466							MT24-3	0.166086
NA0-1	0.712025		0.712025	8.08088	20.0299	15.5087	6.71922	NM0-1	1.6529		1.6529	4.72397	1.47963	2.34567	0.602904
NA0-2	0.885768		0.885768	6.40764	20.6917	14.1723	6.7039	NM0-2	0.607097		0.607097	5.46416	1.54221	1.32869	1.85961
NA0-3	1.5966		1.5966	7.40762	21.8084	13.8152	5.95863	NM0-3	0.0123873		0.0123873	4.63949	2.54727	1.7593	0.809442
NA3-1	11.0809	Mean	1.0648	7.29871	20.8433	14.4987	6.46058	NM3-1	4.72397	Mean	0.757462	4.94254	1.85637	1.81122	1.09065
NA3-2	5.40764	SD	0.468674	0.841916	0.89887	0.892683	0.434773	NM3-2	5.46416	SD	0.830529	0.453706	0.599152	0.510476	0.673897
NA3-3	4.40762							NM3-3	0.639493
NA6-1	17.0299							NM6-1	0.479632
NA6-2	17.6917							NM6-2	1.54221
NA6-3	39.8084							NM6-3	4.54727
NA12-1	17.5087							NM12-1	2.34567
NA12-2	14.1723							NM12-2	1.32869
NA12-3	8.81524							NM12-3	1.7593
NA24-1	3.71922							NM24-1	0.602904
NA24-2	6.7039							NM24-2	1.85961
NA24-3	3.95863							NM24-3	0.809442
		Gene expression
			Control	MT	NaCl	MT+NaCl
		0	1.05	1.04	1.06	0.76
		3	0.32197	1.62076	6.41597	2.54618
		6	0.202594	0.891929	22.8903	1.49831
		12	0.340329	0.387786	12.981	1.76337
		24	0.492547	0.234609	4.62141	0.968171
		SD0	0.371338	0.319848	0.468674	0.830529
		SD3	0.100866	0.662968	0.841916	0.453706
		SD6	0.0192134	1.12131	0.89887	0.599152
		SD12	0.0666593	0.362705	0.892683	0.510476
		SD24	0.114492	0.207702	0.434773	0.673897
									Control	1.05	0.32197	0.202594	0.340329	0.492547
									MT	1.04	1.62076	0.891929	0.387786	0.234609
									NaCl	1.06	6.41597	22.8903	12.981	4.62141
									MT+NaCl	0.76	2.54618	1.49831	1.76337	0.968171
										0.371338	0.100866	0.0192134	0.0666593	0.114492
										0.319848	0.662968	1.12131	0.362705	0.207702
										0.468674	0.841916	0.89887	0.892683	0.434773
										0.830529	0.453706	0.599152	0.510476	0.673897

## Sheet: NfTrKA gene
NfTrkA
CK0-1	1.06807		1.06807	0.888843	0.205185	0.372419	5.90795	MT0-1	0.20733		0.20733	1.20999	2.09841	2.34869	2.63008
CK0-2	1.24401		1.24401	0.639493	0.293209	0.369847	4.6211	MT0-2	1.89212		1.89212	1.25087	3.59667	2.07772	1.85857
CK0-3	0.747425		0.747425	0.510506	0.268874	0.35233	5.37029	MT0-3	2.56685		2.56685	1.4822	2.22491	3.20537	0.694959
CK3-1	0.888843	Mean	1.01983	0.679614	0.255756	0.364865	5.29978	MT3-1	1.20999	Mean	1.55543	1.31435	2.64	2.54392	1.72787
CK3-2	0.639493	SD	0.251782	0.192333	0.0454542	0.0109318	0.646312	MT3-2	0.250868	SD	1.21526	0.14679	0.830912	0.588631	0.974157
CK3-3	0.510506							MT3-3	3.4822
CK6-1	0.205185							MT6-1	0.0984135
CK6-2	0.293209							MT6-2	0.596668
CK6-3	0.268874							MT6-3	8.22491
CK12-1	0.372419							MT12-1	0.348686
CK12-2	0.369847							MT12-2	2.07772
CK12-3	0.35233							MT12-3	5.20537
CK24-1	2.90795							MT24-1	3.63008
CK24-2	7.6211							MT24-2	0.858565
CK24-3	5.37029							MT24-3	0.694959
NA0-1	0.552865		0.552865	29.0965	107.569	60.8227	13.7581	NM0-1	4.50023		1.50023	4.02782	4.40762	17.5307	30.8153
NA0-2	1.31494		1.31494	30.9521	108.449	60.1965	12.3156	NM0-2	0.982821		0.982821	5.1602	4.21344	18.9383	29.2685
NA0-3	1.37078		1.37078	29.5622	109.353	59.5417	12.6845	NM0-3	0.223756		2.22376	5.21146	4.3	17.0372	28.9333
NA3-1	59.0965	Mean	1.07953	29.8703	108.457	60.187	12.9194	NM3-1	4.02782	Mean	1.56894	4.79983	4.30702	17.8354	29.6723
NA3-2	9.95209	SD	0.456959	0.965399	0.89171	0.640536	0.749383	NM3-2	7.1602	SD	0.623314	0.669068	0.0972784	0.986496	1.00391
NA3-3	19.5622							NM3-3	2.21146
NA6-1	27.5695							NM6-1	4.40762
NA6-2	80.4489							NM6-2	4.21344
NA6-3	241.353							NM6-3	4.3
NA12-1	86.8227							NM12-1	37.5307
NA12-2	90.1965							NM12-2	8.9383
NA12-3	28.5417							NM12-3	7.03719
NA24-1	3.75809							NM24-1	10.8153
NA24-2	18.3156							NM24-2	51.2685
NA24-3	12.6845							NM24-3	24.9333
		Gene expression
			Control	MT	NaCl	MT+NaCl
		0	1.02	1.55543	1.08	1.57
		3	0.662044	1.64769	22.5752	3.99538
		6	0.252905	2.97333	81.1958	4.30944
		12	0.364755	2.54392	60.6877	13.3152
		24	4.91889	1.72787	9.55772	24.0006
		SD0	0.251782	1.21526	0.456959	0.623314
		SD3	0.192333	0.14679	0.965399	0.669068
		SD6	0.0454542	0.830912	0.89171	0.0972784
		SD12	0.0109318	0.588631	0.640536	0.986496
		SD24	0.646312	0.974157	0.749383	1.00391
					Control	1.02	0.662044	0.252905	0.364755	4.91889
					MT	1.55543	1.64769	2.97333	2.54392	1.72787
					NaCl	1.08	22.5752	81.1958	60.6877	9.55772
					MT+NaCl	1.57	3.99538	4.30944	13.3152	24.0006
						0.251782	0.192333	0.0454542	0.0109318	0.646312
						1.21526	0.14679	0.830912	0.588631	0.974157
						0.456959	0.965399	0.89171	0.640536	0.749383
						0.623314	0.669068	0.0972784	0.986496	1.00391

## Sheet: Reactive oxygen species 
H2O2
	A412	C0/mM	Vt/L	m/g	m/g	mmol/g
	0.0571	-0.0398918	0.004	0.0271	0.0301111	-0.00529928	0.00529928	5.29928			5.29928	5.47305	10.7438	7.84279
CK	0.0536	-0.0403888	0.004	0.0271	0.0301111	-0.0053653	0.0053653	5.3653			5.3653	5.48068	10.9597	7.80744
	0.0611	-0.0393238	0.004	0.0271	0.0301111	-0.00522383	0.00522383	5.22383			5.22383	5.40247	10.8309	7.83735
	0.0511	-0.0407438	0.004	0.0268	0.0297778	-0.00547305	0.00547305	5.47305			5.29614	5.45207	10.8448	7.8292
MT	0.0507	-0.0408006	0.004	0.0268	0.0297778	-0.00548068	0.00548068	5.48068		SD	0.0707904	0.0431188	0.108588	0.019034
	0.0548	-0.0402184	0.004	0.0268	0.0297778	-0.00540247	0.00540247	5.40247
	0.0543	-0.0402894	0.004	0.0135	0.015	-0.0107438	0.0107438	10.7438
Na	0.0486	-0.0410988	0.004	0.0135	0.015	-0.0109597	0.0109597	10.9597			Mean	SD
	0.052	-0.040616	0.004	0.0135	0.015	-0.0108309	0.0108309	10.8309		Control	5.29614	0.0707904
	0.0496	-0.0409568	0.004	0.0188	0.0208889	-0.00784279	0.00784279	7.84279		MT	5.45207	0.0431188
MT+Na	0.0509	-0.0407722	0.004	0.0188	0.0208889	-0.00780744	0.00780744	7.80744		NaCl	10.8448	0.108588
	0.0498	-0.0409284	0.004	0.0188	0.0208889	-0.00783735	0.00783735	7.83735		MT+NaCl	7.8292	0.019034
y=0.142x-0.048
O2•−
	A530	n/μmol	Vt/ml	m/g	Vs/ml	W*Vs	μmol/g
	0.049	0.0391394	4	0.0301111	0.25	0.00752778	41.5946	2.07973			2.07973	2.05029	3.86089	2.69729
CK	0.045	0.037177	4	0.0301111	0.25	0.00752778	39.5091	1.97546			1.97546	1.97121	3.96555	2.73487
	0.053	0.0411018	4	0.0301111	0.25	0.00752778	43.6801	2.18401			2.18401	2.10301	3.80855	2.77244
	0.047	0.0381582	4	0.0297778	0.25	0.00744444	41.0058	2.05029			2.07973	2.0415	3.87833	2.73487
MT	0.044	0.0366864	4	0.0297778	0.25	0.00744444	39.4242	1.97121		SD	0.104275	0.0663394	0.0799364	0.0375779
	0.049	0.0391394	4	0.0297778	0.25	0.00744444	42.0603	2.10301
	0.043	0.0361958	4	0.015	0.25	0.00375	77.2177	3.86089
Na	0.045	0.037177	4	0.015	0.25	0.00375	79.3109	3.96555			Mean	SD
	0.042	0.0357052	4	0.015	0.25	0.00375	76.1711	3.80855		Control	2.07973	0.104275
	0.041	0.0352146	4	0.0208889	0.25	0.00522222	53.9458	2.69729		MT	2.0415	0.0663394
MT+Na	0.042	0.0357052	4	0.0208889	0.25	0.00522222	54.6973	2.73487		NaCl	3.87833	0.0799364
	0.043	0.0361958	4	0.0208889	0.25	0.00522222	55.4489	2.77244		MT+NaCl	2.73487	0.0375779
y=0.4906x+0.0151

## Sheet: Antioxidant Enzymes Activities
CAT													SOD
	A1	A2	A1-A2		m/g		U/g FW		248.6	293.8	452	542.4		A空1	A空2	A空1-A空2	A测定	A对照	A测定-A对照	抑制百分率	U/g FW
	1.615	1.626	-0.011	-7.458	0.03	-248.6	248.6		180.8	293.8	406.8	565		0.233	0.0374	0.1956	0.0869	0.0407	0.0462	0.763804	35.9271		35.9271	29.3577	72.4714	144.113
CK	1.614	1.622	-0.008	-5.424	0.03	-180.8	180.8		226	271.2	406.8	497.2	CK	0.233	0.0374	0.1956	0.0744	0.0411	0.0333	0.829755	54.1487		54.1487	44.1856	68.2008	85.0456
	1.614	1.624	-0.01	-6.78	0.03	-226	226		218.467	286.267	421.867	534.867		0.233	0.0374	0.1956	0.0803	0.0385	0.0418	0.786299	40.8784		40.8784	46.3798	92.3717	99.7633
	1.617	1.63	-0.013	-8.814	0.03	-293.8	293.8		34.5221	13.0481	26.0962	34.5221		0.233	0.0374	0.1956	0.0919	0.0382	0.0537	0.72546	29.3577		43.6514	39.9744	77.6813	109.64
MT	1.615	1.628	-0.013	-8.814	0.03	-293.8	293.8		a	b	c	d	MT	0.233	0.0374	0.1956	0.0876	0.0483	0.0393	0.79908	44.1856		9.42199	9.25953	12.9002	30.7473
	1.615	1.627	-0.012	-8.136	0.03	-271.2	271.2			Mean	SD			0.233	0.0374	0.1956	0.0876	0.0498	0.0378	0.806748	46.3798		a	a	b	c
	1.613	1.633	-0.02	-13.56	0.03	-452	452		Control	218.467	34.5221			0.233	0.0374	0.1956	0.0672	0.0412	0.026	0.867076	72.4714			Mean	SD
Na	1.612	1.63	-0.018	-12.204	0.03	-406.8	406.8		MT	286.267	13.0481		Na	0.233	0.0374	0.1956	0.0706	0.0432	0.0274	0.859918	68.2008		Control	43.6514	9.42199
	1.61	1.628	-0.018	-12.204	0.03	-406.8	406.8		NaCl	421.867	26.0962			0.233	0.0374	0.1956	0.0673	0.0463	0.021	0.892638	92.3717		MT	39.9744	9.25953
	1.611	1.635	-0.024	-16.272	0.03	-542.4	542.4		MT+NaCl	534.867	34.5221			0.233	0.0374	0.1956	0.0557	0.0417	0.014	0.928425	144.113		NaCl	77.6813	12.9002
MT+Na	1.608	1.633	-0.025	-16.95	0.03	-565	565						MT+Na	0.233	0.0374	0.1956	0.0609	0.0383	0.0226	0.884458	85.0456		MT+NaCl	109.64	30.7473
	1.608	1.63	-0.022	-14.916	0.03	-497.2	497.2							0.233	0.0374	0.1956	0.0685	0.0489	0.0196	0.899796	99.7633
APX													GR
	A1	A2	A3	A4	A1-A2	A3-A4		U/g FW						A空1	A空2	A测1	A测2	A空1-A空2	A测1-A测2	U/g FW
	0.863	0.868	0.871	0.879	-0.005	-0.008	-0.00537	5.37						0.4206	0.42	0.3745	0.3674	0.000600005	0.00710002	5.80451
CK	0.863	0.864	0.876	0.879	-0.001	-0.003	-0.00358	3.58					CK	0.4206	0.42	0.3727	0.3655	0.000600005	0.0072	5.8938
	0.863	0.864	0.882	0.884	-0.001	-0.002	-0.00179	1.79						0.4206	0.42	0.3889	0.382	0.000600005	0.00690001	5.62591
	0.863	0.864	0.839	0.843	-0.001	-0.004	-0.00537	5.37						0.4206	0.42	0.3507	0.3458	0.000600005	0.00489998	3.83988
MT	0.863	0.864	0.93	0.933	-0.001	-0.003	-0.00358	3.58					MT	0.4206	0.42	0.3751	0.3709	0.000600005	0.00419998	3.21478
	0.863	0.864	0.942	0.945	-0.001	-0.003	-0.00358	3.58						0.4206	0.42	0.3771	0.373	0.000600005	0.00409999	3.12549
	0.863	0.864	0.82	0.826	-0.001	-0.006	-0.00895	8.95						0.4206	0.42	0.3697	0.3603	0.000600005	0.00940003	7.85842
Na	0.863	0.864	0.851	0.858	-0.001	-0.007	-0.01074	10.74					Na	0.4206	0.42	0.3658	0.3515	0.000600005	0.0143	12.2341
	0.863	0.864	0.866	0.875	-0.001	-0.009	-0.01432	14.32						0.4206	0.42	0.3321	0.3206	0.000600005	0.0115	9.73369
	0.863	0.864	0.936	0.946	-0.001	-0.01	-0.01611	16.11						0.4206	0.42	0.3691	0.3508	0.000600005	0.0183	15.8061
MT+Na	0.863	0.864	0.938	0.952	-0.001	-0.014	-0.02327	23.27					MT+Na	0.4206	0.42	0.3468	0.3307	0.000600005	0.0161	13.8415
	0.863	0.864	0.933	0.941	-0.001	-0.008	-0.01253	12.53						0.4206	0.42	0.3379	0.3231	0.000600005	0.0148	12.6806
			5.37	5.37	8.95	16.11									5.80451	3.83988	7.85842	15.8061
			3.58	3.58	10.74	23.27									5.8938	3.21478	12.2341	13.8415
			1.79	3.58	14.32	12.53									5.62591	3.12549	9.73369	12.6806
			3.58	4.17667	11.3367	17.3033									5.77474	3.39338	9.94206	14.1094
		SD	1.79	1.03346	2.73427	5.46854								SD	0.136405	0.389244	2.19526	1.57988
				Mean	SD											Mean	SD
			Control	3.58	1.79										Control	5.77474	0.136405
			MT	4.17667	1.03346										MT	3.39338	0.389244
			NaCl	11.3367	2.73427										NaCl	9.94206	2.19526
			MT+NaCl	19.3033	5.46854										MT+NaCl	14.1094	1.57988

[truncated: 3 more sheets: NfCAT gene, NfSOD gene, NfGR gene]
